# Supplementary material
Source: PubMed Central journal article supplement (PMC5659117)
Supplement: NIHMS909186-supplement-supplement_1.pdf [file NIHMS909186-supplement-supplement_1.pdf]

Appendix

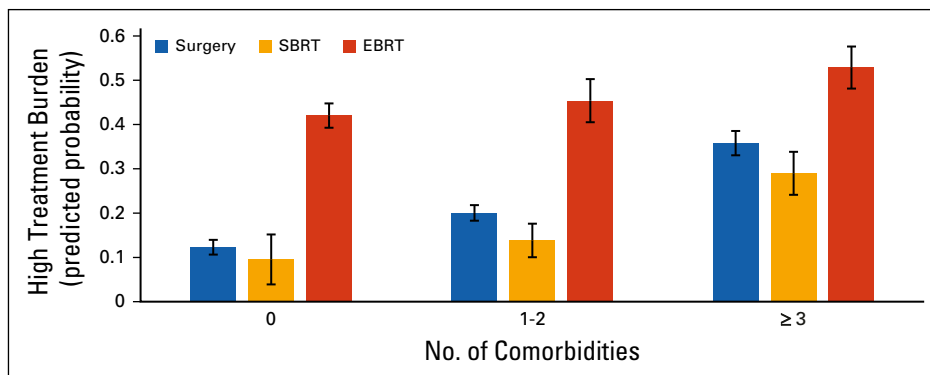

**FIG A1.** Predicted probability of high treatment burden by treatment type and comorbidity. High treatment burden was defined as the highest quartile of encounter days ( $\geq 66$  encounter days). EBRT, external beam radiation therapy; SBRT, stereotactic body radiation therapy.
